# Supplementary material for: Vision and Visuomotor Performance Following Acute Ischemic Stroke
Source: Front Neurol. 2022 Feb 16;13:757431. doi: 10.3389/fneur.2022.757431 (PMC8889933; doi:10.3389/fneur.2022.757431)
Supplement: Supplementary Table S1 — Raw data for controls and stroke participants. [file Table_1.xlsx]

## Sheet: 1. Controls
Any queries should be directed to: Chamini Wijesundera <chamini_20@hotmail.com>
			Visual Acuity		Visual Field			SLURP EHC
ID	Gender	Age	VA (LogMAR)	VAn (LogMAR)	MD (dB)	VF time (s)	FT R side-RE	SLURP err #	Disp	total time
C1	M	51	0	0	0.6	128	30	29	2041.46	24.573
C2	F	44	0	0.1	0.6	127	30	28	1187.92	19.974
C3	F	59	0.1	0.3	-0.42	163	30	12	1124.28	23.706
C4	F	61	0.1	0.2	0.14	152	30	29	2836.25	23.439
C5	M	54	0.1	0.1	0.6	126	30	30	2355.02	27.44
C6	M	64	0.1	0.3	0.51	129	30	18	2096	34.175
C7	F	64	0	0	0.6	127	30	29	2849.48	29.974
C8	M	70	0.2	0.2	0.06	150	30	29	4161.12	36.441
C9	F	68	0.2	0.2	0.08	130	29	31	6969.04	35.242
C10	F	69	0.1	0.2	0.03	154	26	21	6412.58	35.308
C11	M	68	0	0.2	0.66	127	30	24	3183.94	28.574
C12	F	63	0	0	-0.05	132	29	22	2407.9	24.173
C13	M	77	0	0.1	0.93	130	29	13	1921.24	38.309
C14	M	65	0	0.2	-0.16	135	29	22	3552.35	23.039
C15	F	56	0	0.1	-0.33	158	30	14	1441.78	22.839
C16	F	68	0	0	0.23	129	30	14	2218.4	22.105
C17	M	61	0.1	0.2	0.6	126	30	20	2081.77	23.105
C18	M	58	0	0	0.51	128	30	21	2737.24	24.506
C19	F	64	0	0	1.55	113	30	13	2110.15	29.641
C20	M	33	0	0	0.6	126	30	11	1665.63	26.773
C21	F	29	0	0	-0.42	117	30	20	2069.43	21.972
C22	M	65	0.1	0.1	0.01	160	27	23	2201.52	39.8
C23	F	68	0.1	0.1	-0.62	167	30	4	722.71	53.711
C24	F	64	0.1	0.2	-0.23	116	30	32	5287.11	35.642
C25	M	77	0.1	0.3	1.32	136	30	23	2767.58	39.777
C26	F	85	0.1	0.3	1.63	157	30	29	2944.48	35.308
C27	F	80	0.1	0.3	1.36	183	28	32	5287.11	35.642
C28	F	69	0	0.1	0.66	127	30	33	3816.25	33.976
C29	M	65	0.1	0.1	0.3	135	29	12	2177.6	64.637
C30	F	64	0.1	0.2	-0.79	139	26	20	3236.67	35.977
C31	F	78	0.1	0.1	-0.77	138	30	30	2230.96	22.572
C32	F	59	0.1	0.2	0.34	133	28	29	1802.75	25.639
C33	F	65	0	0.1	-0.14	123	30	34	1910.69	29.775
C34	F	71	0.1	0.2	0.64	140	28	30	1905.96	28.173
C35	M	79	0.1	0.2	-0.13	162	27	38	1928.65	27.373
C36	F	60	0	0	0.43	116	30	5	1479.66	60.776
C37	F	76	0.1	0.2	-0.2	144	22	6	1668.32	42.11
C38	F	63	0.1	0.1	1.2	132	26	15	1645.62	63.112
C39	M	67	0	0	0.8	133	26	18	2477.66	50.576
C40	M	60	0	0	0.6	113	30	32	2307.89	24.704

## Sheet: 2.Stroke (AIS)
					Visual Acuity		Visual Field					SLURP (EHC)
ID	Date Seen	Gender	Age	Test Day	VA (LogMAR)	VAn (LogMAR)	MD (dB)	FT CONT LESION	FT	VFD	NIHSS Score	total time (s)	Err #	Tot Disp	Dx	Imaging Dx-TW
AIS1	2017-07-02	M	66	2	0.1	0.3	-13.86	12	18.5	L hemianopia	1	58.848	19	3147.69	R OCC AND R CEREBRELLA	Right cerebellar and right occiptal infarction with occulded right vertrebal artery and a PFO
AIS2	2017-07-06	M	63	2	0.1	0.4	-2.29	27	27	Mild bilat sup depression/mild hemianopia	13	131.638	39	17056.5	L MCA	Left MCA stroke with predominant involvement of Broca's area
AIS3	2017-07-08	F	88	4	0	0.2	-5.3	17	22	sup mild depression/mild hemianopia	13	118.794	35	10504.2	L MCA	small left superior division territory frontal MCA infarction
AIS4	2017-07-16	F	64	2	0.1	0.3	-5.53	23	27	mild sup depression/mild hemianopia	3	52.047	24	8906.84	L MCA	Left MCA territory infarction, appeared old with lot of FLAIR changes
AIS5	2017-07-26	F	38	4	0	0.2	-1.31	28	29	mildL hemianopia?	9	59.78	36	9411.86	R MCA	Large right MCA infarction in the setting of migraine
AIS6	2017-07-27	F	77	3	0.1	0.3	-4.05	20	27	Milc hemianopia	2	94.327	34	7887.25	R cerebrellar	Acute right cerebellar infarction on CT brain, no MRI available
AIS7	2017-08-01	M	77	2	0.1	0.3	-1.79	26	29	Mild depression in sensitivty?	1	248.562	33	13057.5	R cerebrellar	Old right cerebellar infacrtion
AIS8	2017-08-04	F	53	2	0	0.2	-1.1	29	29	normal	5	25.44	2	714.58	R MCA
AIS9	2017-08-06	M	82	4	0.1	0.3	-1.54	23	28	mild R hemianopia?	4	52.378	24	3129.75	R frontal lobe ischemic	Small right frontal infarct, subcortical
AIS10	2017-08-06	F	84	2	0.2	0.4	0.87	27	30	normal	7	93.455	21	100761	L MCA	Left MCA stroke on perfusion diffusion CT with full recover and normal CT brain post thrombolysis 24 hours later
AIS11	2017-08-12	M	66	3	0	0.3	-6.32	30	14	L superior quadranopia	4	39.776	8	976.86	R OCC	Right medial occiptal lobe infarction, acute
AIS12	2017-08-13	M	70	2	0.2	0.2	-8.86	15	22	R resolving hemianopia?	1	72.917	9	1881.68	L inf cerebrellar	Left infereior cerebellar infarction,left medulla level brain stem infarction
AIS13	2017-08-13	M	79	3	0.1	0.6	-4.13	17	29	mild R hemianopia?	2	118.794	35	10504.2	L MCA & L OCCI	Left MCA stroke and left occiptal lobe infarction
AIS14	2017-08-15	M	32	2	0	0.2	-0.44	30	29	normal	1	29.773	17	4514.71	L cerebrellar	Left cerebellar stroke ischemic in a young 32 year old man
AIS15	2017-08-16	M	55	4	0.1	0.3	-6.79	20	18.5	inferior altitudinal defect	9	29.907	3	2030.41	R MCA	Acute large right MCA stroke complicated with tPA induced right cerebellar bleed which is small
AIS16	2017-08-30	F	70	1	0.1	0.3	-7.23	23	20.5	mild resolving L hemianopia?	11	64.316	10	8383.76	R precentral gyrus acute infarction	right precentral gyrus acute infarction please note the UR is wrong correct UR is 040763
AIS17	2017-09-01	F	57	3	0.1	0.4	-15.05	15	15	L hemianopia	3	69.116	13	9987.64	R OCC	right occiptal acute ischemia, right ICA occlusion,
AIS18	2017-09-11	M	52	6	0	0.2	-0.23	28	30	normal	11	46.179	10	1957.45	L frontal	Left focal frontal infarct next to M3 branch vessle probably occluded there. Sub cortical infarction
AIS19	2017-09-11	M	61	4	0	0.6	-0.4	29	28	normal	0	123.8	23	3258.91	L basal ganglia stroke	Left basal ganglia (putamen) of uncertain chronicity likley to be few days to a week or so old, compatible with a lacune as the size is less than 1.5cm
AIS20	2017-09-18	F	50	2	0	0.2	-0.05	30	30	normal	1	81.452	36	18046.5	Acute right hemi pontine stroke	Acute right hemi pontine stroke
AIS21	2017-10-12	M	37	2	0	0.1	-9.05	30	22.5	L hemianopia	3	32.242	4	720.21	R OCC	Acute right occiptal stroke on MRI
AIS22	2017-10-12	F	53	3	0.1	0.3	-0.42	29	30	normal	3	55.921	21	2910.27	R prefrontal	Acute stroke affecting right pre frontal cortex on CT brain no evidence of a mRI brain in a young patient!
AIS23	2017-10-16	M	62	2	0.1	0.4	-0.29	28	30	resolving R hemianopia?	1	46.711	23	3414.09	L cerebrellar	Old left cerebellar ischemic stroke with evidence of gliosis in MRI brain confirming the stroke is fairly old.
AIS24	2017-10-16	M	82	4	0.2	0.5	-0.07	22	30	Resolving R hemianopia?	9	111.793	21	2891.91		Left corona radiata acute lacunar infarction less tha 1.5 cm in size new stroke
AIS25	2017-10-20	F	42	2	0	0.2	-1.29	29	29	Mild R hemianopia?	1	38.31	8	1669.42	L parietal-temporal stroke	left prairto-temporal stroke affecting large area of left MCA territory with likley M1 occlusion or significant narrowing in MRA
AIS26	2017-11-05	M	57	2	0	0.3	0.23	30	30	normal	2	63.248	24	5165.79	L ACA	Left ACA/MCA watershead territory stroke with left A1 clot with complete occlusion of left subclavian artery at the origin
AIS27	2017-11-10	M	74	3	0.2	0.3	-0.86	26	27	Mild R hemianopia	0	78.386	27	3867.01	L MCA	left inferior frontal guyrus cortical infarction on MRI , high grade left ICA stenosis, complete occlusion of left vertebral artery
AIS28	2017-11-15	M	72	4	0.3	0.6	0.47	29	29	normal	3	101.324	29	32552.1	R MCA	Right internal capsule , posterior limb territory infacrtion
AIS29	2017-11-28	M	74	3	0	0.6	0.44	26	30	normal	3	97.057	33	6396.95	L MCA	left internal capsule territory infarction due to left lenticulostrate perforator infacrtion with no cortical involvement on MRI brain
AIS30	2019-10-11	F	65	7	0.1	0.6	-6.86	24	4.5	L hemianopia	1	65.779	18	7681.58	R occi stroke
AIS31	2017-11-29	F	64	5	0	0.4	-0.68	26	30	normal	0	43.443	8	1858.53	L cellebrellar	Acute left cerebellar infarction in community MRI brain
AIS32	2017-12-06	F	76	3	0	0.6	-0.24	24	28	normal	0	107.392	15	3983.59	L lenticulostriate lacunar infarct	Left lenticulostriate lacunar infarct affecting left internal capsule with no CT evidence of cortical involvement
AIS33	2017-12-14	F	63	3	0	0.1	-23.12	8	0	R hemianopia	6	66.716	11	2940.1	L PCA	left PCA territory infarction affecting left occiptal lobe and left inferior temporal gyrus on MRI
AIS34	2017-12-14	F	34	6	0	0	0.32	30	30	normal	1	68.916	31	7609.21	R superior fronto-parietal cerebral venous infacrts	right superior fronto-parietal cerebral venous infacrts with associated superior sagittal sinus and left transverse sinus thrombosis with cortical involvement of the stroke
AIS35	2018-05-04	F	62	3	0	0.7	-2.01	28	28	quadrantanopia	3	44.644	6	1619.52	Multiterritorial infarct	Inferior left parietal subcortical stroke, right thalamic infacrtion on MRI brain with no evidence of vessle occlusion
AIS36	2018-05-08	M	68	2	0.1	0.2	0.1	30	30	normal	1	317.45	43	247410	L cerebrellar
AIS37	2018-05-18	F	81	7	0	0.2	-6.09	26	3	normal	2	94.522	17	6065.68	R MCA
AIS38	2018-05-21	M	78	7	0.2	0.6	-15.53	0.5	11	R hemianopia	5	243.025	66	16840.9	L PCA
AIS39	2018-05-29	M	77	5	0.1	0.5	-10.98	3	7	R incongruous hemianopia,one eye has quad	5	83.518	16	8835.79	L occi
AIS40	2018-06-13	M	55	2	0	0.1	-5.83	24	17	Normal	8	58.164	26	9942.95	R ICA
AIS41	2018-06-13	M	80	7	0	0.1	-1.07	17	19	normal	1	52.445	12	1603.26	L cerebrellar infarct
AIS42	2018-06-13	F	66	5	0.3	0.8	-19.88	4.5	0	L hemianopia	5	203.482	32	103821	R large PCA infarct,
AIS43	2018-07-10	M	70	2	0.2	0.8	-8.86	27	13	L hemianopia+Some R inf involvemnet too incongrous	7	133.966	41	66197.8	R occipital and severel multiple lesions
AIS44	2018-07-25	F	76	7	0.3	0.8	-16.09	12	12	L hemianopia+Some Rsup involvemnet too incongrous	4	157.471	70	49550.8	multiteritorial infarct occi+mca
AIS45	2018-08-03	M	66	2	0.1	0.4	-10.53	18	7.5	R incongrous hemianopia	6	77.055	9	7863	L posterior parietal
AIS46	2018-08-17	F	86	5	0.1	0.4	-7.52	21	17	R mild incongrous hemianopia with some LE sup-nasal involvement	1	162.205	41	42090.1	L PCA
AIS47	2018-08-17	M	62	5	0	0.1	-4.23	29	29	normal-some mild losses in RE around fovea	3	67.85	12	2109.09	R ACA
AIS48	2018-08-17	F	55	7	0	0.2	-0.2	25	25	normal	1	69.05	35	19691.9	multiple territory, occi+parietal
AIS49	2018-09-04	M	44	3	0	0	0.6	30	30	normal	2	21.771	3	481.68	L cellebrellar
AIS50	2018-09-19	F	65	7	0	0	-5.34	26	28	R incongrouos inf quadrantanopia	5	52.18	21	2619.13	L frontal-parietal
AIS51	2018-09-19	M	61	4	0.2	0.3	-11.01	10	19	L incongrous heminaopia	1	76.118	4	3578.79	R MCA-D4
AIS52	2018-09-19	F	67	6	0.1	0.3	-5.29	26	25	normal	2	102.257	29	3748.59	R pons,D6
AIS53	2018-09-26	F	76	3	0.1	0.4	-14.46	12	9	R incongrous hemianopia	14	145.334	53	9753.82	L MCA,D3
AIS54	2018-09-26	M	59	2	0.3	0.6	-20.42	0	1.5	L hemianopia	18	199.414	25	24096.5	R MCA,D2
AIS55	2018-09-26	M	79	6	0.1	0.1	-2.53	21	18	R mild superior quadranopia	6	172.605	30	15061.3	L MCA and parietal lobe infarction,D6,
AIS56	2018-09-26	F	29	5	0.1	0.3	-7.27	23	17	L hemianopia	1	69.983	24	6961.18	R OCCI and thalmic,D5,
AIS57	2018-10-05	F	67	2	0	0.1	-4.66	20	19	R inf quadrantanopia	1	193.946	97	10231.8	L OCCI
AIS58	2018-10-11	F	71	3	0	0.2	-0.06	23	25	R mild resolving hemianopia	2	85.049	32	10520.7	L PCA,Lcerebrellar signs,had vomiting,mild cals,atm diplopia at near
AIS59	2018-10-17	M	80	2	0.2	0.4	-2.87	23	21	Normal	1	94.589	18	6619.4	L Basal ganglia infarct
AIS60	2018-10-23	M	53	2	0	0.1	-0.2	25	26	normal	0	39.976	7	966.63	R inferior cerebrellar
